# Supplementary material for: Properties and Degradability of Poly(Butylene Adipate-Co-Terephthalate)/Calcium Carbonate Films Modified by Polyethylene Glycol
Source: MDPI journal article supplement (doi:10.3390/polym14030484), 2022-01-26
Supplement: s1 [file s1]

# **Supporting Information**

## **Properties and degradability of poly(butylene adipate-co-terephthalate)/calcium carbonate films modified by polyethylene glycol**

Xiaoqian Diao<sup>1,2</sup>, Caili Zhang<sup>\*1,2</sup>, Yunxuan Weng<sup>\*1,2</sup>

<sup>1</sup> Beijing Key Laboratory of Quality Evaluation Technology for Hygiene and Safety of Plastics, Beijing Technology and Business University, Beijing 100048, China.

<sup>2</sup> College of Chemistry and Materials Engineering, Beijing Technology and Business University, Beijing 100048, China.

\* Correspondence: zhangcaili@btbu.edu.cn; wyxuan@th.btbu.edu.cn.

## **Characterizations:**

The chemical structure of coating agent and degradation films was analyzed by Fourier transform infrared spectroscopy (FTIR) within performed on a Nicolet iN10 spectrometer (ThermoFisher Scientific) with 4  $\text{cm}^{-1}$  resolution and 32 scanning frequency in the range of 400–4000  $\text{cm}^{-1}$ . The chemical structure of coating agent was also confirmed by  $^1\text{H}$  NMR spectra using  $\text{CDCl}_3$  as the solvent (Bruker Avance 400 M).

Before testing the mechanical properties, the prepared samples were placed in the laboratory environment conditioning for 24 h. The tensile characteristics of the specimens were evaluated using a microcomputer-regulated electronic universal testing machine (Mester Industrial Systems Limited Corporation, CMT6104, China), according to the standard of GB/T 1040–2006. During the test, the tensile speed was 200 mm/min whereas the distance between the clamps was set as 50 mm. Individual groups of samples were tested five times, and the average value was taken according to the effective value. Using the same machine, the tear resistance properties of the samples were tested according to the standard of GB/T 106578.1–2008. During the test, the distance between the clamps was set as 50 mm and the tearing speed was kept at 100 mm/min. Individual groups of samples were tested five times, and the average value was taken according to the effective value.

The rheological characteristics of the composites were determined using a plate rheometer (Anton Paar, MCR502, Austria). The storage modulus, and complex viscosity of the composites were measured. The test temperature was 170°C, and 19

points were selected in the range of 0.01–100 rad/s.

The surface morphology of the films was observed by scanning electron microscope (FEI company, USA, Quanta 250 FEG) at 1000 times magnification. The accelerating voltage used in the scanning process was 10 kV.

Gel permeation chromatography was used to assess the molecular weight of the degradation films (GPC, 20A, Shimadzu, Japan). To make a 0.2 mg/ mL solution, 2 mg of fully dried material was dissolved in 10 mL dichloromethane. Then, the obtained solution was filtered with a polytetrafluoroethylene (PTFE) filter to remove impurities. As a mobile phase, dichloromethane was used at a flow rate of 2 mL/min. The molecular weight calibration curve was created using a variety of monodisperse polystyrene standards with molecular weights ranging from 3000 to 100,000 kDa. Then the molecular weight of the sample was obtained.

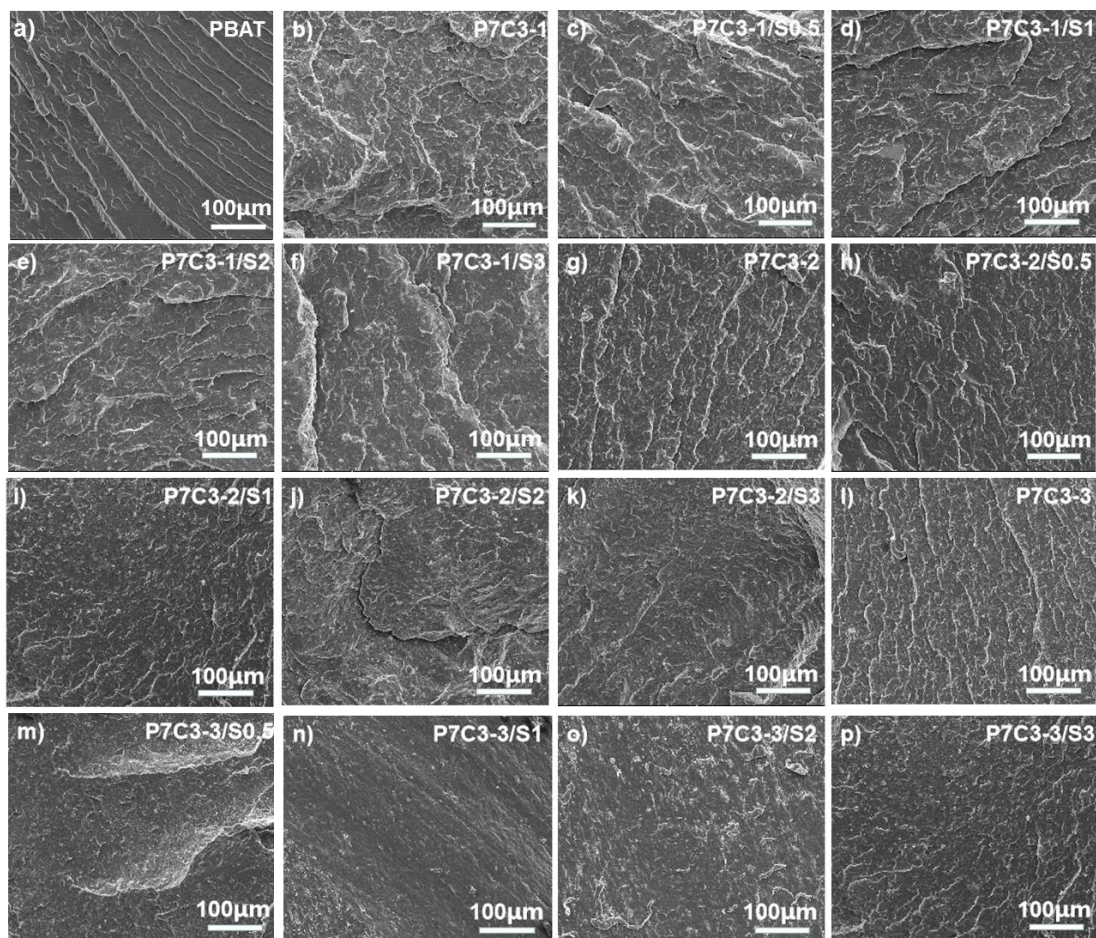

**Figure S1** SEM images of films ( $\times 1000$ ): (a) neat PBAT, (b) P7C3-1, (c) P7C3-1/S0.5, (d) P7C3-1/S1, (e) P7C3-1/S2, (f) P7C3-1/S3; (g) P7C3-2, (h) P7C3-2/S0.5, (i) P7C3-2/S1, (j) P7C3-2/S2, (k) P7C3-2/S3; (l) P7C3-3, (m) P7C3-3/S0.5, (n) P7C3-3/S1, (o) P7C3-3/S2, (p) P7C3-3/S3.

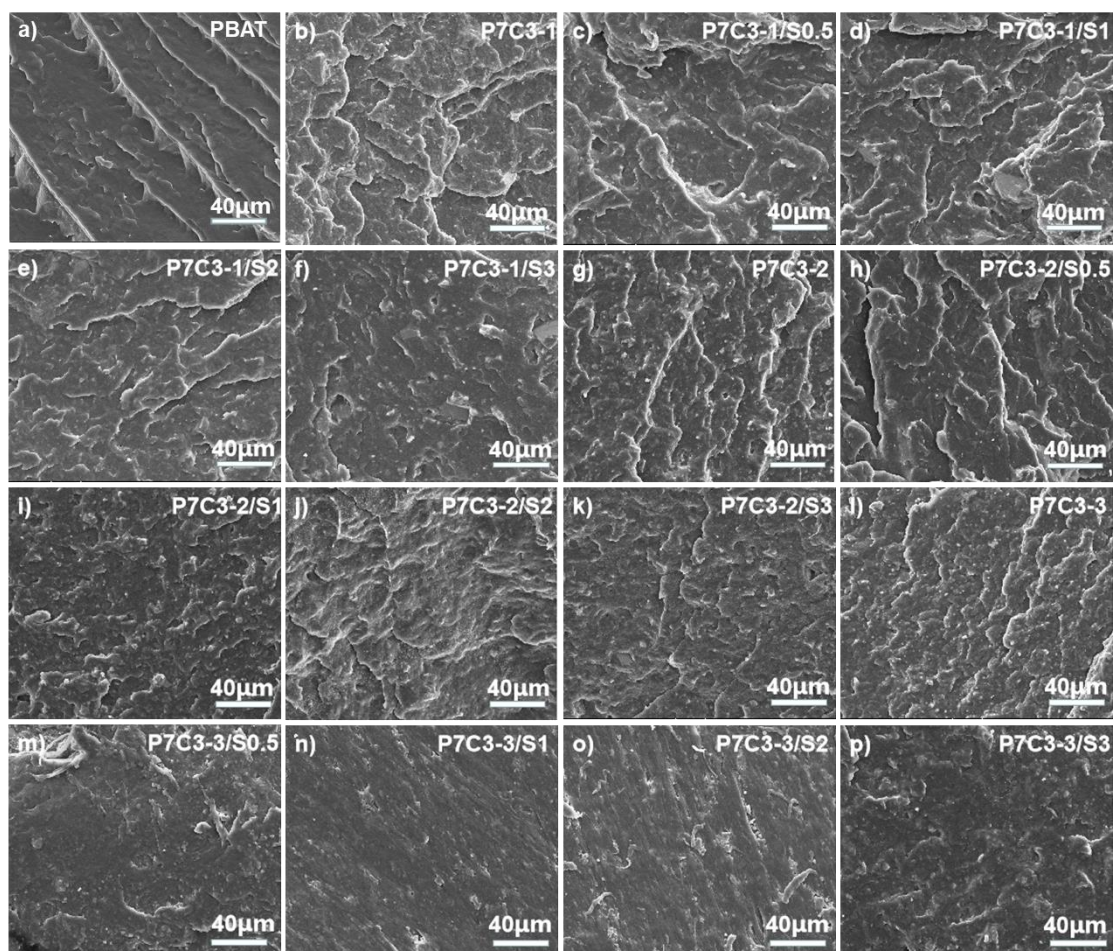

**Figure S2** SEM images of films ( $\times 3000$ ): (a) neat PBAT, (b) P7C3-1, (c) P7C3-1/S0.5, (d) P7C3-1/S1, (e) P7C3-1/S2, (f) P7C3-1/S3; (g) P7C3-2, (h) P7C3-2/S0.5, (i) P7C3-2/S1, (j) P7C3-2/S2, (k) P7C3-2/S3; (l) P7C3-3, (m) P7C3-3/S0.5, (n) P7C3-3/S1, (o) P7C3-3/S2, (p) P7C3-3/S3.

**Table S1** Changes in molecular weight of PBAT/CaCO<sub>3</sub> films under buried soil

| Sample codes | 0 days molecular weight |        | 30 days molecular weight |        | 60 days molecular weight |       | 90 days molecular weight |       |
|--------------|-------------------------|--------|--------------------------|--------|--------------------------|-------|--------------------------|-------|
|              | $M_n$                   | $M_w$  | $M_n$                    | $M_w$  | $M_n$                    | $M_w$ | $M_n$                    | $M_w$ |
| PBAT         | 63514                   | 98339  | 48209                    | 93002  | 33888                    | 94077 | --                       | --    |
| P7C3-1       | 57146                   | 98275  | 54425                    | 95770  | 50444                    | 99184 | 46580                    | 85049 |
| P7C3-1/S0.5  | 54254                   | 99790  | 50504                    | 94084  | 38737                    | 86734 | --                       | --    |
| P7C3-1/S1    | 52607                   | 97634  | 47275                    | 98797  | 31265                    | 81616 | --                       | --    |
| P7C3-1/S2    | 52080                   | 96503  | 46754                    | 82819  | 36000                    | 82945 | --                       | --    |
| P7C3-1/S3    | 50178                   | 88744  | 41569                    | 97109  | 38746                    | 84788 | --                       | --    |
| P7C3-2       | 57052                   | 106400 | 52481                    | 105147 | 32648                    | 88034 | --                       | --    |
| P7C3-2/S0.5  | 52998                   | 102524 | 28155                    | 80735  | --                       | --    | --                       | --    |
| P7C3-2/S1    | 52942                   | 98754  | 31740                    | 84944  | --                       | --    | --                       | --    |
| P7C3-2/S2    | 53622                   | 98065  | 47430                    | 93315  | 45902                    | 90017 | --                       | --    |
| P7C3-2/S3    | 50002                   | 91734  | 43763                    | 88303  | 35899                    | 82005 | --                       | --    |
| P7C3-3       | 58816                   | 102590 | 39358                    | 100613 | --                       | --    | --                       | --    |
| P7C3-3/S0.5  | 58014                   | 102438 | 50271                    | 96016  | 48009                    | 92742 | --                       | --    |
| P7C3-3/S1    | 54416                   | 96075  | 43860                    | 90667  | 37291                    | 85384 | --                       | --    |
| P7C3-3/S2    | 54295                   | 95732  | 50242                    | 91201  | 39519                    | 87239 | 32690                    | 82163 |
| P7C3-3/S3    | 50096                   | 92205  | 49272                    | 89227  | 44612                    | 86435 | 39330                    | 83485 |

**Table S2** Changes in molecular weight (g/mol) of PBAT/CaCO<sub>3</sub> films under simulated seawater degradation conditions

| Sample codes | Original films |        | After 30 days |        | After 60 days |        | After 90 days |        |
|--------------|----------------|--------|---------------|--------|---------------|--------|---------------|--------|
|              | $M_n$          | $M_w$  | $M_n$         | $M_w$  | $M_n$         | $M_w$  | $M_n$         | $M_w$  |
| PBAT         | 63514          | 98339  | 60215         | 96722  | 53909         | 111460 | 42531         | 94057  |
| P7C3-1       | 57146          | 98275  | 56906         | 98852  | 54902         | 98242  | 50532         | 93333  |
| P7C3-1/S0.5  | 54254          | 99790  | 53905         | 10027  | 51464         | 92942  | 45323         | 92519  |
| P7C3-1/S1    | 52607          | 97634  | 52003         | 103590 | 50014         | 100842 | 44626         | 98123  |
| P7C3-1/S2    | 52080          | 96503  | 51711         | 94901  | 51532         | 99921  | 47761         | 95893  |
| P7C3-1/S3    | 50178          | 88744  | 50068         | 91863  | 49255         | 98750  | 47947         | 96889  |
| P7C3-2       | 57052          | 106400 | 56827         | 107090 | 55040         | 107914 | 50560         | 94473  |
| P7C3-2/S0.5  | 52998          | 102524 | 51264         | 99873  | 50372         | 107362 | 44561         | 101059 |
| P7C3-2/S1    | 52942          | 98754  | 51349         | 96157  | 51248         | 102649 | 46497         | 99744  |
| P7C3-2/S2    | 53622          | 98065  | 52890         | 94464  | 52772         | 99637  | 43945         | 93705  |
| P7C3-2/S3    | 50002          | 91734  | 50238         | 92378  | 49755         | 96238  | 42650         | 90735  |
| P7C3-3       | 58816          | 102590 | 57716         | 103953 | 53344         | 94952  | 40399         | 94148  |
| P7C3-3/S0.5  | 58014          | 102438 | 56251         | 105369 | 51364         | 103388 | 40786         | 101168 |
| P7C3-3/S1    | 54416          | 96075  | 54765         | 97778  | 50539         | 96346  | 42795         | 99594  |
| P7C3-3/S2    | 54295          | 95732  | 54082         | 94793  | 48052         | 95268  | 42420         | 97557  |
| P7C3-3/S3    | 50096          | 92205  | 48364         | 89691  | 47137         | 93759  | 42614         | 90300  |
